# Supplementary material
Source: Royal Society of Chemistry journal article supplement (doi:10.1039/d6dt00382f)
Supplement: d6dt00382f1.pdf [file d6dt00382f1.pdf]

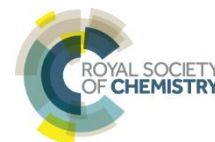

Journal Name

ARTICLE

Supporting Information

**Dense inorganic–organic sodium–gadolinium sulfite–oxalate networks constructed from short bridging ligands: synthesis, structures and magnetic refrigeration behaviour**

**Ranjay K. Tiwari,<sup>a, b</sup> Ashish A. Rout,<sup>a, b</sup> and J. N. Behera<sup>\*a, b</sup>**

<sup>a</sup>*School of Chemical Sciences, National Institute of Science Education and Research (NISER), An OCC of Homi Bhabha National Institute (HBNI), Khordha, Bhubaneswar 752050, Odisha, India.*

<sup>b</sup>*Centre for Interdisciplinary Sciences (CIS), NISER, Jatni, Bhubaneswar 752050, Odisha, India.*

**\*Email:** [jnbehera@niser.ac.in](mailto:jnbehera@niser.ac.in)

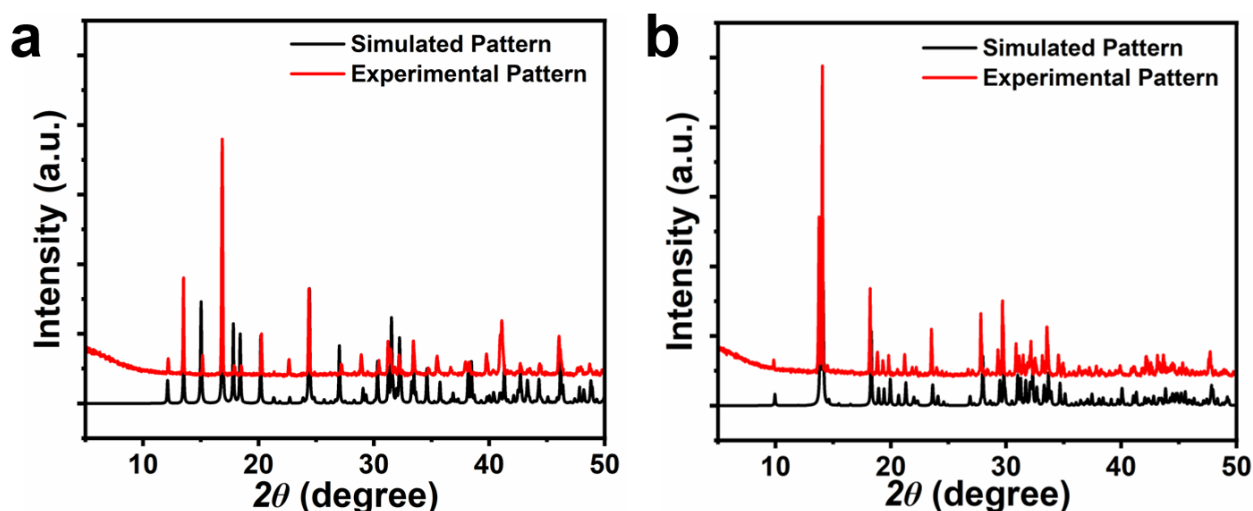

Fig. S1. PXRD pattern for (a) compound  $[\text{NaGd}(\text{SO}_3)(\text{C}_2\text{O}_4)(\text{H}_2\text{O})_2]_\infty$ , **1** and (b)  $[\text{Na}_3\text{Gd}(\text{SO}_3)_2(\text{C}_2\text{O}_4)(\text{H}_2\text{O})]_\infty$ , **2**.

### FTIR

Compounds **1** and **2** were characterized by FTIR spectroscopy to ensure the presence of key functional groups within their crystal structures (Fig. S2). Both spectra show distinct absorption bands for the sulfite ( $\text{SO}_3^{2-}$ ) anion at nearly 970, 930, 620, and 470  $\text{cm}^{-1}$ . Additional bands at around 2450  $\text{cm}^{-1}$  (C=O stretching), 1950  $\text{cm}^{-1}$  (asymmetric C=C stretching), and 1070  $\text{cm}^{-1}$  (C–O bending) support the presence of the oxalate ( $\text{C}_2\text{O}_4^{2-}$ ) anion. Moreover, the broad features observed in the 3450–3500  $\text{cm}^{-1}$  region are attributed to O–H stretching vibrations, which originate from water molecules.

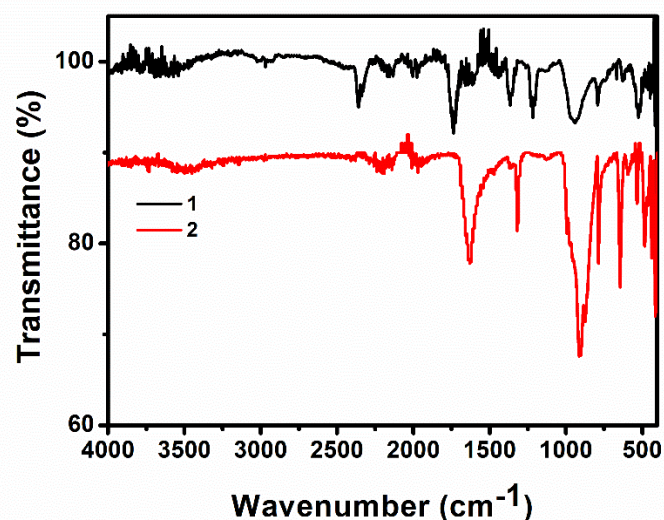

Fig. S2. FTIR spectra for compound **1** and **2**.

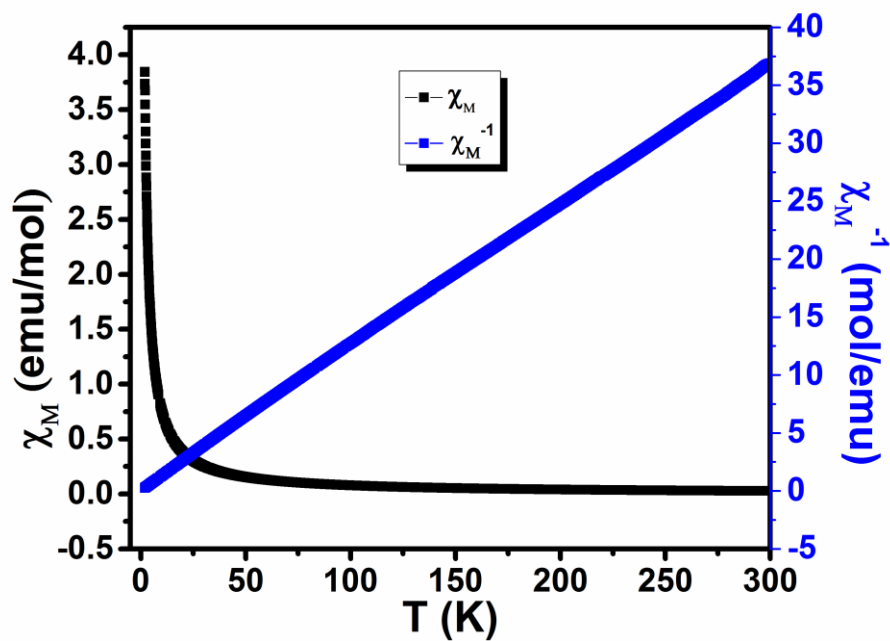

Fig. S3. Temperature dependence of the field DC magnetic susceptibility ( $\chi_M$ ) and ( $\chi_M^{-1}$ ) of compound **2** at 1000 Oe.

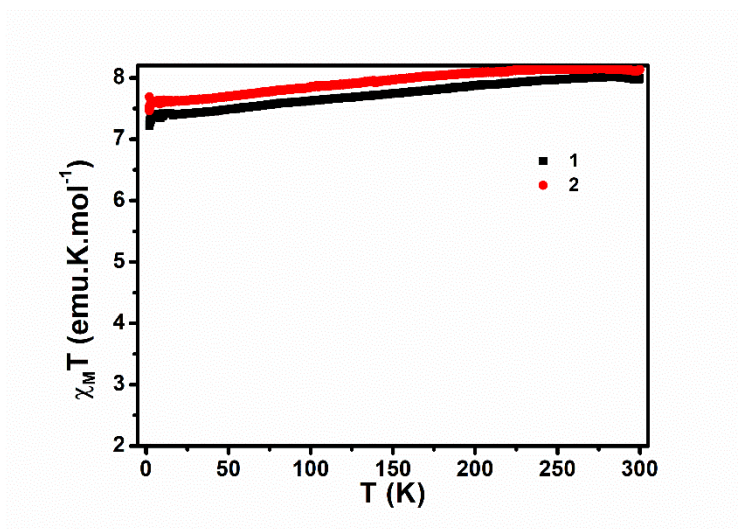

Fig. S4. Temperature dependence of the  $\chi_M T$  curves of compounds **1** and **2** at 1000 Oe.

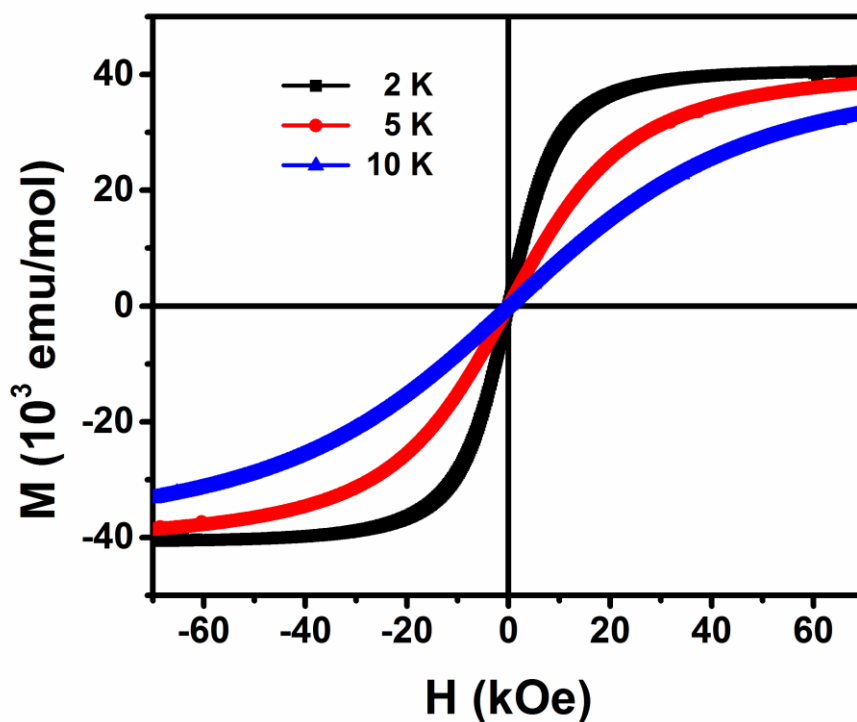

Fig. S5. Isothermal Magnetization vs. magnetic field ( $H$ ) profile diagram at 2, 5 and 10 K for compound 2.

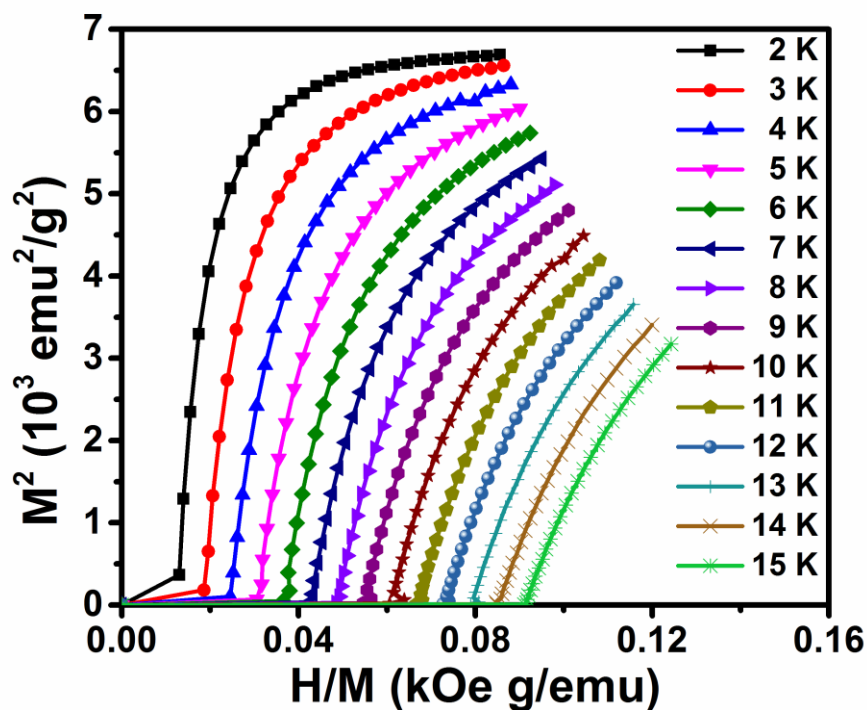

Fig. S6. The Arrott plots ( $M^2$  vs  $H/M$ ) for compound 2.

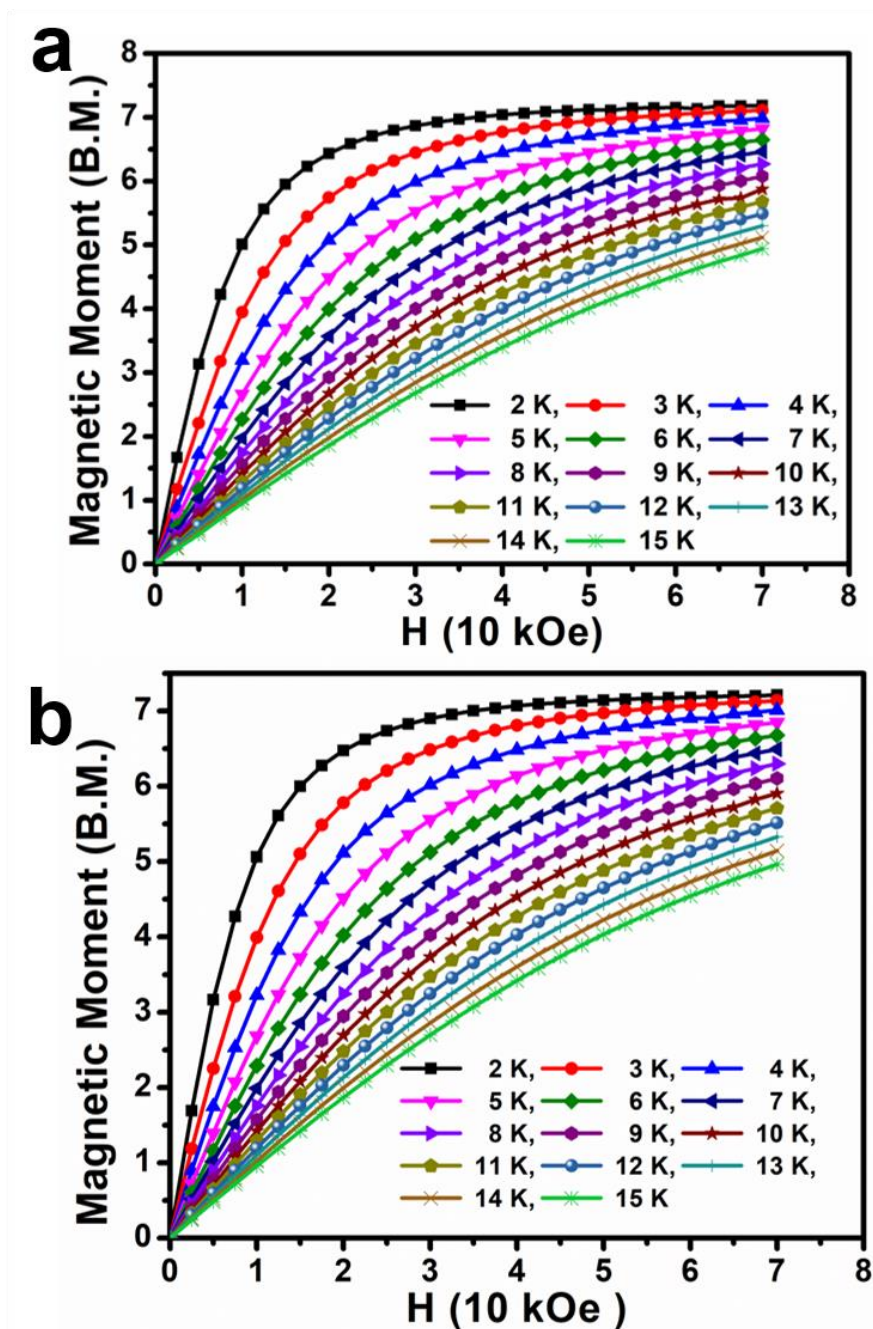

**Fig. S7.** First quadrant Isothermal Magnetization vs. magnetic field (H) profile diagram at 2, 5 and 10 K for compound **1** (a) and **2** (b).

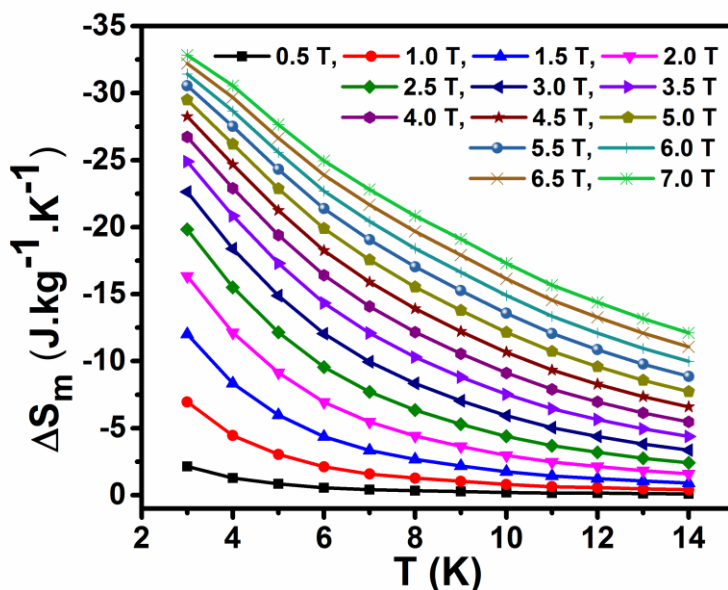

**Fig. S8.** Temperature-dependent change in magnetic entropy at an interval of 0.5 T applied field of compound **2**.

#### Thermogravimetric analysis (TGA)

The thermal stability of compounds **1** and **2** was evaluated by thermogravimetric analysis (TGA) using a TA instrument over the temperature range of 30–700 °C at a constant heating rate of 5 °C min<sup>-1</sup> under a continuous N<sub>2</sub> atmosphere. Both compounds exhibit multi-step thermal decomposition profiles, indicating the sequential removal of coordinated water molecules followed by decomposition of the framework ligands (Fig. S9). For both materials, the first weight-loss step occurs between 280–310 °C, corresponding to the elimination of coordinated aqua ligands. The observed mass losses of 8.12% for compound **1** and 4.03% for compound **2** agree well with the calculated values of 8.0% and 3.92%, respectively, confirming the presence of lattice/coordinated water molecules as determined from single-crystal structural analysis. The second decomposition stage, observed in the temperature range of 425–600 °C, is attributed to the breakdown of the anhydrous framework accompanied by the evolution of SO<sub>3</sub> and CO<sub>2</sub> gases from the sulfite and oxalate ligands. This step results in weight losses of 18.12% (calc. 18.05%) for **1** and 15.98% (calc. 16.05%) for **2**, further supporting the proposed compositions. The decomposition was carried out under a N<sub>2</sub> atmosphere up to 700 °C, with a total treatment duration of 2 h. Upon complete decomposition, the remaining residual product were analyzed by PXRD. The final products consist of thermally stable inorganic phases, including Gd<sub>2</sub>O<sub>3</sub>, Gd<sub>2</sub>O<sub>2</sub>S, NaS, and Gd<sub>2</sub>OS<sub>2</sub> for compound **1** (Fig. S10), and NaS, Gd<sub>2</sub>OS<sub>2</sub>, and Gd<sub>2</sub>O<sub>2</sub>S for compound **2** (Fig. S11). The formation of these oxide/sulfide species reflects the decomposition of sulfite-containing frameworks under an inert atmosphere. Both the compounds demonstrate good thermal stability up to ~280 °C, indicating that the coordination frameworks remain intact under moderate thermal conditions. The close agreement between experimental and calculated mass losses further confirms the structural integrity and compositional accuracy of the synthesized materials.

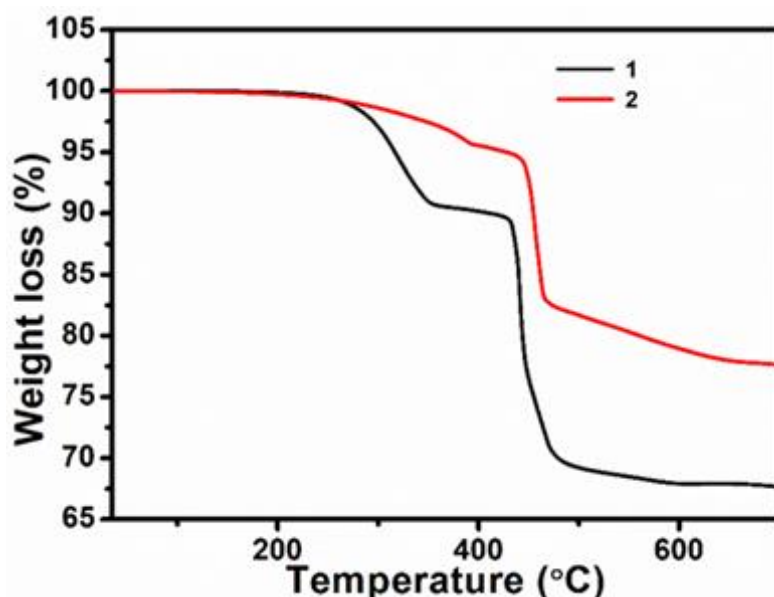

Fig. S9. TGA curves of **1** and **2**.

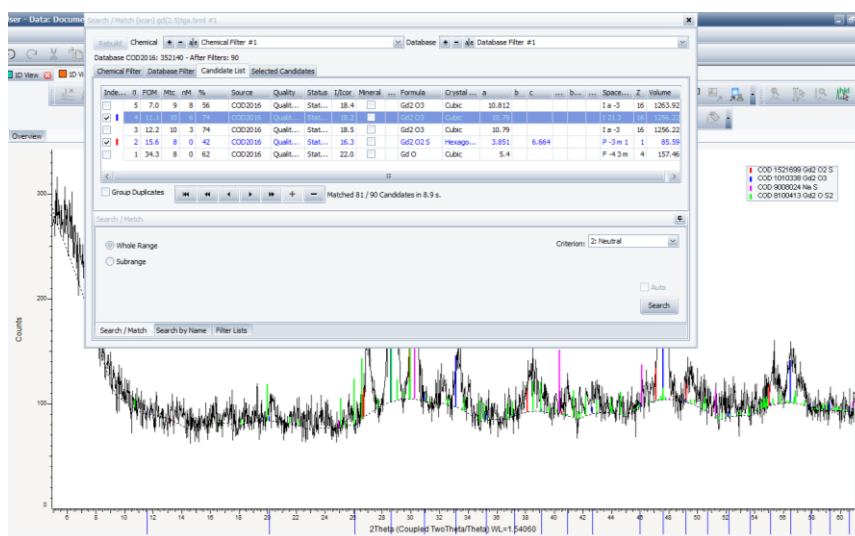

Fig. S10. Post calcination PXRD pattern analysis of  $[\text{NaGd}(\text{SO}_3)(\text{C}_2\text{O}_4)(\text{H}_2\text{O})_2]_\infty$ , **1** showing formation of  $\text{Gd}_2\text{O}_3$  (COD 1010338),  $\text{Gd}_2\text{O}_2\text{S}$  (COD 1521699), NaS (COD 9014900) and  $\text{Gd}_2\text{OS}_2$  (COD 8100413) mixtures.

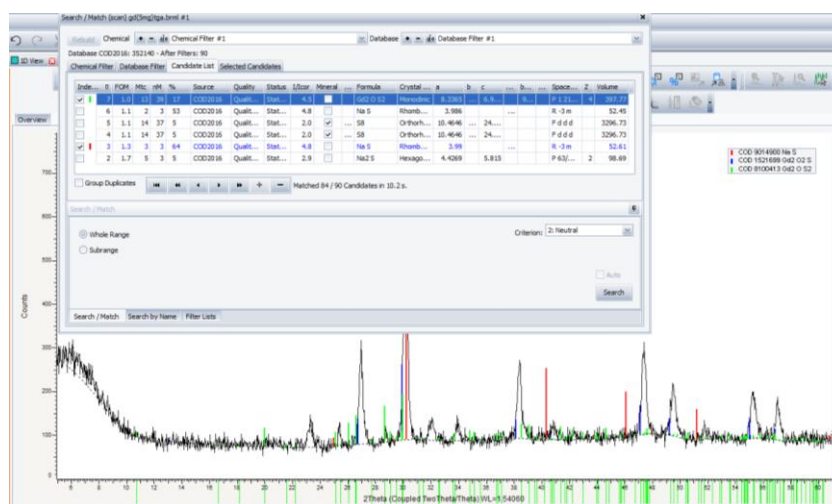

**Fig. S11.** Post calcination PXRD analysis of  $[\text{Na}_3\text{Gd}(\text{SO}_3)_2(\text{C}_2\text{O}_4)(\text{H}_2\text{O})]_\infty$ , **2** showing formation of NaS (COD 901490),  $\text{Gd}_2\text{O}_3$ (COD 8100413) and  $\text{Gd}_2\text{O}_2\text{S}$  (COD 1521699) mixtures.

**Table S1.** Comparison table of change in Magnetic Entropy ( $-\Delta S_m$ ) for Gd(III) Molecular MCE Compounds.

| Compounds                                                                                                                                                                                        | $-\Delta S_m$ (J K <sup>-1</sup> kg <sup>-1</sup> ) | $\Delta H$ (T) | $T$ (K)  | References       |
|--------------------------------------------------------------------------------------------------------------------------------------------------------------------------------------------------|-----------------------------------------------------|----------------|----------|------------------|
| [Gd(OH)CO <sub>3</sub> ] <sub>n</sub>                                                                                                                                                            | 66.4                                                | 7              | 1.8      | 1                |
| {[Gd <sub>2</sub> (CO <sub>3</sub> )(ox) <sub>2</sub> (H <sub>2</sub> O) <sub>2</sub> ] <sub>3</sub> H <sub>2</sub> O} <sub>n</sub>                                                              | 58.5                                                | 7              | 2        | 2                |
| [Gd <sub>4</sub> (SO <sub>4</sub> ) <sub>4</sub> (μ <sub>3</sub> -OH) <sub>4</sub> (H <sub>2</sub> O) <sub>4</sub> ] <sub>n</sub>                                                                | 51.29                                               | 7              | 2        | 3                |
| [Gd(HCOO)(SO <sub>4</sub> )(H <sub>2</sub> O)] <sub>n</sub>                                                                                                                                      | 49.91                                               | 7              | 2        | 4                |
| [Gd(C <sub>2</sub> O <sub>4</sub> )(H <sub>2</sub> O) <sub>3</sub> Cl]                                                                                                                           | 48.0                                                | 7              | 2.2      | 5                |
| [Gd(HCOO)(OAc) <sub>2</sub> (H <sub>2</sub> O) <sub>2</sub> ] <sub>n</sub>                                                                                                                       | 45.9                                                | 7              | 1.8      | 6                |
| GdPO <sub>4</sub>                                                                                                                                                                                | 44.79                                               | 9              | 2        | 7                |
| <b>[NaGd(SO<sub>3</sub>)(C<sub>2</sub>O<sub>4</sub>)(H<sub>2</sub>O)<sub>2</sub>]</b>                                                                                                            | <b>41.58</b>                                        | <b>7</b>       | <b>3</b> | <b>This work</b> |
| Li <sub>3</sub> K <sub>9</sub> Gd <sub>3</sub> (BO <sub>3</sub> ) <sub>7</sub>                                                                                                                   | 39.3                                                | 7              | 2        | 8                |
| [Gd <sub>28</sub> (IN) <sub>25</sub> (C <sub>2</sub> O <sub>4</sub> ) <sub>6</sub> (HCOO)(μ <sub>3</sub> -OH) <sub>36</sub> (μ <sub>2</sub> -OH) <sub>2</sub> (H <sub>2</sub> O) <sub>36</sub> ] | 37.5                                                | 7              | 2        | 9                |
| <b>[Na<sub>3</sub>Gd(SO<sub>3</sub>)<sub>2</sub>(C<sub>2</sub>O<sub>4</sub>)(H<sub>2</sub>O)]</b>                                                                                                | <b>32.84</b>                                        | <b>7</b>       | <b>3</b> | <b>This work</b> |
| [Gd(BTC)(DMF)]                                                                                                                                                                                   | 32                                                  | 5              | 1.8      | 10               |
| [Gd(BTC)(H <sub>2</sub> O)] <sub>4</sub> ·4H <sub>2</sub> O                                                                                                                                      | 38                                                  | 5              | 1.8      | 10               |
| Gd <sub>17.33</sub> (BO <sub>3</sub> ) <sub>4</sub> (B <sub>2</sub> O <sub>5</sub> ) <sub>2</sub> O <sub>16</sub>                                                                                | 26.5                                                | 7              | 4.4      | 11               |
| {[Gd <sub>2</sub> (FUM) <sub>3</sub> (H <sub>2</sub> O) <sub>4</sub> ] <sub>3</sub> H <sub>2</sub> O} <sub>n</sub>                                                                               | 21                                                  | 5              | 2.5      | 12               |

## References:

1. Y.-C. Chen, L. Qin, Z.-S. Meng, D.-F. Yang, C. Wu, Z. Fu, Y.-Z. Zheng, J.-L. Liu, R. Tarasenko, M. Orendáč, J. Prokleška, V. Sechovský and M.-L. Tong, *J. Mater. Chem. A*, 2014, **2**, 9851-9858.
2. Q. Tang, Y.-L. Yang, N. Zhang, Z. Liu, S.-H. Zhang, F.-S. Tang, J.-Y. Hu, Y.-Z. Zheng and F.-P. Liang, *Inorg. Chem.*, 2018, **57**, 9020-9027.
3. S.-D. Han, X.-H. Miao, S.-J. Liu and X.-H. Bu, *Inorg. Chem. Front.*, 2014, **1**, 549-552.
4. L.-Y. Xu, J.-P. Zhao, T. Liu and F.-C. Liu, *Inorg. Chem.*, 2015, **54**, 5249-5256.
5. Y. Meng, Y.-C. Chen, Z.-M. Zhang, Z.-J. Lin and M.-L. Tong, *Inorg. Chem.*, 2014, **53**, 9052-9057.
6. G. Lorusso, M. A. Palacios, G. S. Nichol, E. K. Brechin, O. Roubeau and M. Evangelisti, *Chem. Commun.*, 2012, **48**, 7592-7594.
7. M. Lassri, S. El Ouahbi, I. Abdelrhafre, L. E. Hachemi Omari, A. El Hachmi, H. Hamouda, B. Harradi, Y. Ounza, G. Viscusi, C. Minaud, C. Jama and H. Lassri, *J. Magn. Magn. Mater.*, 2025, **629**, 173291.
8. W. Liu, F. Liang, Y. Chen, H. Song, J. Feng, J. Shen, Z. Lin, H. Tu and G. Zhang, *Inorg. Chem.*, 2021, **60**, 6796-6803.
9. Qin Wang, Sheng-Hui Lu, Ling-Xi Xu, Ji-Lei Wang, Ya-Ting Yu, Xu Bai, Hua Mei, Yan Xu, *Inorg. Chem. Front.*, 2023, **10**, 4109-4116
10. Vladimír Zeleňák, Miroslav Almáši, Adriána Zeleňáková, Pavol Hrubovčák, Róbert Tarasenko, Sandrine Bourelly, Philip Llewellyn, *Sci. Rep.*, 2019, **9**, 15572 (2019).
11. Huimin Song, Naizheng Wang, Wang Liu, Jingcheng Feng, Jun Shen, Wei Dai, Zheshuai Lin, Jiyong Yao, Guochun Zhang, *Inorg. Chem.*, 2020, **59**, 11071-11078.
12. L. Sedláková, J. Hanko, A. Orendáčová, M. Orendáč, C. L. Zhou, W. H. Zhu, B. W. Wang, Z. M. Wang, S. Gao, *J. Alloys Compd.*, 2009, **487**, 425-429.

**Table S2.** Complete list of bond lengths [Å] and bond angles [°] for compounds **1-2<sup>#</sup>**

| Bond lengths                                                                                         | [Å]        | Bond lengths                           | [Å]        | Bond lengths                          | [Å]        |
|------------------------------------------------------------------------------------------------------|------------|----------------------------------------|------------|---------------------------------------|------------|
| <b>[NaGd(SO<sub>3</sub>)(C<sub>2</sub>O<sub>4</sub>)(H<sub>2</sub>O)<sub>2</sub>]<sub>∞</sub>, 1</b> |            |                                        |            |                                       |            |
| Gd1-O1                                                                                               | 2.304(3)   | Gd1-O2W <sup>d</sup>                   | 2.670(3)   | Na1-O6 <sup>c</sup>                   | 2.631(3)   |
| Gd1-O2 <sup>b</sup>                                                                                  | 2.409(3)   | S1-O1                                  | 1.526(3)   | Na1-O7 <sup>f</sup>                   | 2.400(3)   |
| Gd1-O3 <sup>a</sup>                                                                                  | 2.302(3)   | S1-O2                                  | 1.524(3)   | Na1-O2W                               | 2.489(4)   |
| Gd1-O4                                                                                               | 2.529(3)   | S1-O3                                  | 1.520(3)   | O4-C2                                 | 1.246(5)   |
| Gd1-O5                                                                                               | 2.483(3)   | Na1-O1 <sup>a</sup>                    | 2.899(3)   | O6-C1                                 | 1.252(6)   |
| Gd1-O6 <sup>c</sup>                                                                                  | 2.506(3)   | Na1-O3 <sup>a</sup>                    | 2.709(3)   | O7-C2                                 | 1.258(5)   |
| Gd1-O7 <sup>c</sup>                                                                                  | 2.500(3)   | Na1-O4 <sup>a</sup>                    | 2.401(3)   | O5-C1                                 | 1.251(5)   |
| Gd1-O1W                                                                                              | 2.415(3)   | Na1-O5                                 | 2.297(3)   | C2-C1                                 | 1.544(6)   |
|                                                                                                      |            |                                        |            |                                       |            |
| Bond angles                                                                                          | [°]        | Bond angles                            | [°]        | Bond angles                           | [°]        |
| O3 <sup>a</sup> -Gd1-O1                                                                              | 144.53(12) | O4-Gd1-Na1                             | 99.17(7)   | O5-Na1-Gd1 <sup>a</sup>               | 138.15(10) |
| O3 <sup>a</sup> -Gd1-O2 <sup>b</sup>                                                                 | 85.33(12)  | O2W <sup>d</sup> -Gd1-Na1              | 116.48(8)  | O7 <sup>f</sup> -Na1-Gd1 <sup>a</sup> | 39.88(8)   |
| O1-Gd1-O2 <sup>b</sup>                                                                               | 86.09(11)  | O3 <sup>a</sup> -Gd1-Na1 <sup>e</sup>  | 164.78(8)  | O4 <sup>a</sup> -Na1-Gd1 <sup>a</sup> | 40.60(8)   |
| O3 <sup>a</sup> -Gd1-O1W                                                                             | 81.48(12)  | O1-Gd1-Na1 <sup>e</sup>                | 49.44(8)   | O2W-Na1-Gd1 <sup>a</sup>              | 123.93(10) |
| O1-Gd1-O1W                                                                                           | 83.62(11)  | O2 <sup>b</sup> -Gd1-Na1 <sup>e</sup>  | 104.40(8)  | O6 <sup>c</sup> -Na1-Gd1 <sup>a</sup> | 127.82(9)  |
| O2 <sup>b</sup> -Gd1-O1W                                                                             | 140.56(11) | O1W-Gd1-Na1 <sup>e</sup>               | 97.36(9)   | O3 <sup>a</sup> -Na1-Gd1 <sup>a</sup> | 84.73(8)   |
| O3 <sup>a</sup> -Gd1-O5                                                                              | 76.55(11)  | O5-Gd1-Na1 <sup>e</sup>                | 96.04(7)   | O1 <sup>a</sup> -Na1-Gd1 <sup>a</sup> | 37.09(6)   |
| O1-Gd1-O5                                                                                            | 130.63(10) | O7 <sup>c</sup> -Gd1-Na1 <sup>e</sup>  | 38.01(7)   | Gd1-Na1-Gd1 <sup>a</sup>              | 121.71(5)  |
| O2 <sup>b</sup> -Gd1-O5                                                                              | 67.88(10)  | O6 <sup>c</sup> -Gd1-Na1 <sup>e</sup>  | 98.19(8)   | Na1-O2W-Gd1 <sup>g</sup>              | 134.38(15) |
| O1W-Gd1-O5                                                                                           | 142.12(10) | O4-Gd1-Na1 <sup>e</sup>                | 38.18(8)   | Na1-O2W-H2WA                          | 111(4)     |
| O3 <sup>a</sup> -Gd1-O7 <sup>c</sup>                                                                 | 128.96(11) | O2W <sup>d</sup> -Gd1-Na1 <sup>e</sup> | 121.37(8)  | Gd1 <sup>g</sup> -O2W-H2WA            | 99(4)      |
| O1-Gd1-O7 <sup>c</sup>                                                                               | 75.50(11)  | Na1-Gd1-Na1 <sup>e</sup>               | 121.71(5)  | Na1-O2W-H2WB                          | 107(4)     |
| O2 <sup>b</sup> -Gd1-O7 <sup>c</sup>                                                                 | 140.33(10) | O3-S1-O2                               | 104.76(18) | Gd1 <sup>g</sup> -O2W-H2WB            | 98(4)      |
| O1W-Gd1-O7 <sup>c</sup>                                                                              | 72.56(11)  | O3-S1-O1                               | 102.5(2)   | H2WA-O2W-H2WB                         | 104(7)     |
| O5-Gd1-O7 <sup>c</sup>                                                                               | 98.13(10)  | O2-S1-O1                               | 104.58(19) | C2-O4-Na1 <sup>e</sup>                | 144.6(3)   |
| O3 <sup>a</sup> -Gd1-O6 <sup>c</sup>                                                                 | 66.77(11)  | O5-Na1-O7 <sup>f</sup>                 | 167.60(14) | C2-O4-Gd1                             | 113.3(3)   |
| O1-Gd1-O6 <sup>c</sup>                                                                               | 138.63(11) | O5-Na1-O4 <sup>a</sup>                 | 114.64(13) | Na1 <sup>e</sup> -O4-Gd1              | 101.22(12) |
| O2 <sup>b</sup> -Gd1-O6 <sup>c</sup>                                                                 | 131.90(10) | O7 <sup>f</sup> -Na1-O4 <sup>a</sup>   | 71.26(11)  | C1-O6-Gd1 <sup>h</sup>                | 120.6(3)   |
| O1W-Gd1-O6 <sup>c</sup>                                                                              | 75.15(11)  | O5-Na1-O2W                             | 91.21(12)  | C1-O6-Na1 <sup>h</sup>                | 126.9(3)   |
| O5-Gd1-O6 <sup>c</sup>                                                                               | 67.95(10)  | O7 <sup>f</sup> -Na1-O2W               | 97.81(12)  | Gd1 <sup>h</sup> -O6-Na1 <sup>h</sup> | 93.75(11)  |
| O7 <sup>c</sup> -Gd1-O6 <sup>c</sup>                                                                 | 64.47(10)  | O4 <sup>a</sup> -Na1-O2W               | 104.95(13) | S1-O1-Gd1                             | 144.97(19) |
| O3 <sup>a</sup> -Gd1-O4                                                                              | 140.13(11) | O5-Na1-O6 <sup>c</sup>                 | 68.48(11)  | S1-O1-Na1 <sup>e</sup>                | 98.51(16)  |
| O1-Gd1-O4                                                                                            | 68.14(10)  | O7 <sup>f</sup> -Na1-O6 <sup>c</sup>   | 103.19(12) | Gd1-O1-Na1 <sup>e</sup>               | 93.47(11)  |
| O2 <sup>b</sup> -Gd1-O4                                                                              | 72.99(10)  | O4 <sup>a</sup> -Na1-O6 <sup>c</sup>   | 166.30(13) | S1-O2-Gd1 <sup>b</sup>                | 143.96(19) |
| O1W-Gd1-O4                                                                                           | 135.50(11) | O2W-Na1-O6 <sup>c</sup>                | 88.07(12)  | S1-O3-Gd1 <sup>e</sup>                | 152.11(19) |
| O5-Gd1-O4                                                                                            | 64.46(10)  | O5-Na1-O3 <sup>a</sup>                 | 72.17(11)  | S1-O3-Na1 <sup>e</sup>                | 107.01(17) |
| O7 <sup>c</sup> -Gd1-O4                                                                              | 67.60(10)  | O7 <sup>f</sup> -Na1-O3 <sup>a</sup>   | 95.78(12)  | Gd1 <sup>e</sup> -O3-Na1 <sup>e</sup> | 96.60(12)  |
| O6 <sup>c</sup> -Gd1-O4                                                                              | 103.71(10) | O4 <sup>a</sup> -Na1-O3 <sup>a</sup>   | 107.96(12) | Gd1-O1W-H1WA                          | 131(5)     |
| O3 <sup>a</sup> -Gd1-O2W <sup>d</sup>                                                                | 72.68(11)  | O2W-Na1-O3 <sup>a</sup>                | 146.92(13) | Gd1-O1W-H1WB                          | 127(7)     |
| O1-Gd1-O2W <sup>d</sup>                                                                              | 72.02(11)  | O6 <sup>c</sup> -Na1-O3 <sup>a</sup>   | 59.45(10)  | H1WA-O1W-H1WB                         | 102(8)     |
| O2 <sup>b</sup> -Gd1-O2W <sup>d</sup>                                                                | 70.42(10)  | O5-Na1-O1 <sup>a</sup>                 | 105.88(11) | C2-O7-Na1 <sup>i</sup>                | 123.0(3)   |
| O1W-Gd1-O2W <sup>d</sup>                                                                             | 70.19(11)  | O7 <sup>f</sup> -Na1-O1 <sup>a</sup>   | 66.70(10)  | C2-O7-Gd1 <sup>h</sup>                | 120.5(3)   |
| O5-Gd1-O2W <sup>d</sup>                                                                              | 129.38(11) | O4 <sup>a</sup> -Na1-O1 <sup>a</sup>   | 60.68(10)  | Na1 <sup>i</sup> -O7-Gd1 <sup>h</sup> | 102.11(12) |
| O7 <sup>c</sup> -Gd1-O2W <sup>d</sup>                                                                | 132.46(10) | O2W-Na1-O1 <sup>a</sup>                | 161.02(12) | C1-O5-Na1                             | 140.5(3)   |
| O6 <sup>c</sup> -Gd1-O2W <sup>d</sup>                                                                | 129.52(10) | O6 <sup>c</sup> -Na1-O1 <sup>a</sup>   | 105.67(11) | C1-O5-Gd1                             | 114.7(3)   |
| O4-Gd1-O2W <sup>d</sup>                                                                              | 126.75(10) | O3 <sup>a</sup> -Na1-O1 <sup>a</sup>   | 50.00(10)  | Na1-O5-Gd1                            | 103.34(12) |
| O3 <sup>a</sup> -Gd1-Na1                                                                             | 45.85(9)   | O5-Na1-Gd1                             | 40.10(8)   | O4-C2-O7                              | 125.9(4)   |
| O1-Gd1-Na1                                                                                           | 167.09(8)  | O7 <sup>f</sup> -Na1-Gd1               | 127.65(10) | O4-C2-C1                              | 117.6(4)   |
| O2 <sup>b</sup> -Gd1-Na1                                                                             | 87.88(8)   | O4 <sup>a</sup> -Na1-Gd1               | 131.78(10) | O7-C2-C1                              | 116.5(4)   |
| O1W-Gd1-Na1                                                                                          | 108.11(8)  | O2W-Na1-Gd1                            | 113.55(10) | O5-C1-O6                              | 126.9(4)   |
| O5-Gd1-Na1                                                                                           | 36.55(7)   | O6 <sup>c</sup> -Na1-Gd1               | 41.78(7)   | O5-C1-C2                              | 116.3(4)   |
| O7 <sup>c</sup> -Gd1-Na1                                                                             | 102.40(7)  | O3 <sup>a</sup> -Na1-Gd1               | 37.54(7)   | O6-C1-C2                              | 116.8(4)   |

|                                                                                                                  |            |                                        |            |                                        |            |
|------------------------------------------------------------------------------------------------------------------|------------|----------------------------------------|------------|----------------------------------------|------------|
| O6 <sup>c</sup> -Gd1-Na1                                                                                         | 44.47(8)   | O1 <sup>a</sup> -Na1-Gd1               | 85.23(7)   |                                        |            |
| <b>[Na<sub>3</sub>Gd(SO<sub>3</sub>)<sub>2</sub>(C<sub>2</sub>O<sub>4</sub>)(H<sub>2</sub>O)]<sub>∞</sub>, 2</b> |            |                                        |            |                                        |            |
| Gd1-O1                                                                                                           | 2.291(3)   | S2-O5                                  | 1.530(3)   | O4-Na2 <sup>j</sup>                    | 2.35(3)    |
| Gd1-O4                                                                                                           | 2.355(3)   | S2-O4                                  | 1.533(3)   | O4-Na1 <sup>o</sup>                    | 2.424(3)   |
| Gd1-O3 <sup>j</sup>                                                                                              | 2.376(3)   | O6-Na2 <sup>j</sup>                    | 2.52(4)    | O5-Na3                                 | 2.376(3)   |
| Gd1-O6 <sup>k</sup>                                                                                              | 2.426(3)   | O6-Na1 <sup>p</sup>                    | 2.638(3)   | O5-Na1 <sup>o</sup>                    | 2.825(4)   |
| Gd1-O7                                                                                                           | 2.447(3)   | O8-C2                                  | 1.248(5)   | C2-O9                                  | 1.259(5)   |
| Gd1-O10 <sup>l</sup>                                                                                             | 2.510(3)   | O8-Na1 <sup>o</sup>                    | 2.526(3)   | C2-C1                                  | 1.545(6)   |
| Gd1-O9 <sup>l</sup>                                                                                              | 2.510(3)   | O8-Na2 <sup>j</sup>                    | 2.739(18)  | C1-O10                                 | 1.249(5)   |
| Gd1-O5 <sup>k</sup>                                                                                              | 2.530(3)   | O2-Na2                                 | 2.26(3)    | O9-Na2 <sup>o</sup>                    | 2.33(2)    |
| Gd1-O8                                                                                                           | 2.543(3)   | O2-Na1                                 | 2.334(4)   | O9-Na1 <sup>j</sup>                    | 2.580(3)   |
| S1-O2                                                                                                            | 1.517(3)   | O3-Na3 <sup>j</sup>                    | 2.594(3)   | O10-Na3 <sup>q</sup>                   | 2.517(3)   |
| S1-O1                                                                                                            | 1.527(3)   | O7-C1                                  | 1.256(5)   | Na1-O1W                                | 2.319(14)  |
| S1-O3                                                                                                            | 1.544(3)   | O7-Na3 <sup>k</sup>                    | 2.539(3)   | Na2-O1W <sup>s</sup>                   | 2.86(2)    |
| S2-O6                                                                                                            | 1.520(3)   | O1-Na3 <sup>m</sup>                    | 2.521(4)   | O4-Na2A <sup>k</sup>                   | 2.46(3)    |
| Na3-O1WA <sup>o</sup>                                                                                            | 2.769(11)  | O6-Na2A <sup>j</sup>                   | 2.37(3)    | O2-Na2A                                | 2.31(3)    |
| O2-Na3 <sup>m</sup>                                                                                              | 2.515(3)   | Na1-O1WA                               | 2.396(14)  | O9-Na2A <sup>n</sup>                   | 2.52(2)    |
| Na1-O1WA                                                                                                         | 2.396(14)  | O3-Na2A                                | 2.57(3)    | O3-Na2                                 | 2.58(2)    |
| Na3-O1WA <sup>o</sup>                                                                                            | 2.769(11)  | O4-Na2A <sup>o</sup>                   | 2.99(2)    | O4-Na2 <sup>j</sup>                    | 2.397(4)   |
| O1-Gd1-O4                                                                                                        | 148.33(11) | C1-O7-Gd1                              | 121.4(3)   | O2 <sup>n</sup> -Na3-Gd1 <sup>n</sup>  | 93.80(9)   |
| O1-Gd1-O3 <sup>j</sup>                                                                                           | 81.54(12)  | C1-O7-Na3 <sup>k</sup>                 | 131.4(3)   | O10 <sup>w</sup> -Na3-Gd1 <sup>n</sup> | 43.55(7)   |
| O4-Gd1-O3 <sup>j</sup>                                                                                           | 85.38(11)  | Gd1-O7-Na3 <sup>k</sup>                | 101.63(12) | O1 <sup>n</sup> -Na3-Gd1 <sup>n</sup>  | 38.57(8)   |
| O1-Gd1-O6 <sup>k</sup>                                                                                           | 133.83(11) | S1-O1-Gd1                              | 149.8(2)   | O7 <sup>t</sup> -Na3-Gd1 <sup>n</sup>  | 133.25(10) |
| O4-Gd1-O6 <sup>k</sup>                                                                                           | 71.86(11)  | S1-O1-Na3 <sup>m</sup>                 | 99.06(16)  | O3 <sup>t</sup> -Na3-Gd1 <sup>n</sup>  | 40.63(7)   |
| O3 <sup>j</sup> -Gd1-O6 <sup>k</sup>                                                                             | 138.97(11) | Gd1-O1-Na3 <sup>m</sup>                | 98.11(12)  | S1 <sup>n</sup> -Na3-Gd1 <sup>n</sup>  | 65.45(4)   |
| O1-Gd1-O7                                                                                                        | 73.13(11)  | S2-O4-Gd1                              | 141.30(18) | O5-Na3-Na1 <sup>n</sup>                | 92.36(10)  |
| O4-Gd1-O7                                                                                                        | 133.89(10) | S2-O4-Na2 <sup>j</sup>                 | 98.65(16)  | O2 <sup>n</sup> -Na3-Na1 <sup>n</sup>  | 36.29(8)   |
| O3 <sup>j</sup> -Gd1-O7                                                                                          | 83.73(11)  | Gd1-O4-Na2 <sup>j</sup>                | 98.26(12)  | O10 <sup>w</sup> -Na3-Na1 <sup>n</sup> | 104.05(9)  |
| O6 <sup>k</sup> -Gd1-O7                                                                                          | 88.08(11)  | S2-O4-Na1 <sup>o</sup>                 | 109.98(16) | O1 <sup>n</sup> -Na3-Na1 <sup>n</sup>  | 88.35(10)  |
| O1-Gd1-O10 <sup>l</sup>                                                                                          | 72.35(11)  | Gd1-O4-Na1 <sup>o</sup>                | 103.78(12) | O7 <sup>t</sup> -Na3-Na1 <sup>n</sup>  | 99.52(10)  |
| O4-Gd1-O10 <sup>l</sup>                                                                                          | 75.99(10)  | Na2 <sup>j</sup> -O4-Na1 <sup>o</sup>  | 92.41(13)  | O3 <sup>t</sup> -Na3-Na1 <sup>n</sup>  | 160.40(10) |
| O3 <sup>j</sup> -Gd1-O10 <sup>l</sup>                                                                            | 66.87(10)  | S2-O5-Na3                              | 125.47(19) | S1 <sup>n</sup> -Na3-Na1 <sup>n</sup>  | 60.08(5)   |
| O6 <sup>k</sup> -Gd1-O10 <sup>l</sup>                                                                            | 134.50(11) | S2-O5-Gd1 <sup>t</sup>                 | 97.65(15)  | Gd1 <sup>n</sup> -Na3-Na1 <sup>n</sup> | 119.84(6)  |
| O7-Gd1-O10 <sup>l</sup>                                                                                          | 137.19(10) | Na3-O5-Gd1 <sup>t</sup>                | 103.90(13) | O5-Na3-Na2 <sup>n</sup>                | 57.59(9)   |
| O1-Gd1-O9 <sup>l</sup>                                                                                           | 92.66(11)  | S2-O5-Na1 <sup>o</sup>                 | 92.97(15)  | O2 <sup>n</sup> -Na3-Na2 <sup>n</sup>  | 34.46(8)   |
| O4-Gd1-O9 <sup>l</sup>                                                                                           | 74.28(10)  | Na3-O5-Na1 <sup>o</sup>                | 126.77(14) | O10 <sup>w</sup> -Na3-Na2 <sup>n</sup> | 131.66(10) |
| O3 <sup>j</sup> -Gd1-O9 <sup>l</sup>                                                                             | 130.41(10) | Gd1 <sup>t</sup> -O5-Na1 <sup>o</sup>  | 105.63(12) | O1 <sup>n</sup> -Na3-Na2 <sup>n</sup>  | 66.46(9)   |
| O6 <sup>k</sup> -Gd1-O9 <sup>l</sup>                                                                             | 76.23(10)  | O8-C2-O9                               | 126.9(4)   | O7 <sup>t</sup> -Na3-Na2 <sup>n</sup>  | 120.21(10) |
| O7-Gd1-O9 <sup>l</sup>                                                                                           | 141.48(10) | O8-C2-C1                               | 116.5(4)   | O3 <sup>t</sup> -Na3-Na2 <sup>n</sup>  | 117.11(10) |
| O10 <sup>l</sup> -Gd1-O9 <sup>l</sup>                                                                            | 64.50(10)  | O9-C2-C1                               | 116.6(4)   | S1 <sup>n</sup> -Na3-Na2 <sup>n</sup>  | 49.63(4)   |
| O1-Gd1-O5 <sup>k</sup>                                                                                           | 76.49(11)  | O10-C1-O(7)                            | 125.6(4)   | Gd1 <sup>n</sup> -Na3-Na2 <sup>n</sup> | 102.47(5)  |
| O4-Gd1-O5 <sup>k</sup>                                                                                           | 123.98(11) | O10-C1-C2                              | 116.9(4)   | Na1 <sup>n</sup> -Na3-Na2 <sup>n</sup> | 58.32(5)   |
| O3 <sup>j</sup> -Gd1-O5 <sup>k</sup>                                                                             | 149.36(11) | O7-C1-C2                               | 117.5(4)   | O5-Na3-Gd1 <sup>t</sup>                | 39.45(8)   |
| O6 <sup>k</sup> -Gd1-O5 <sup>k</sup>                                                                             | 57.38(10)  | C2-O9-Na2 <sup>o</sup>                 | 115.9(3)   | O2 <sup>n</sup> -Na3-Gd1 <sup>t</sup>  | 127.25(9)  |
| O7-Gd1-O5 <sup>k</sup>                                                                                           | 69.67(11)  | C2-O9-Gd1 <sup>s</sup>                 | 120.0(3)   | O10 <sup>w</sup> -Na3-Gd1 <sup>t</sup> | 129.40(10) |
| O10 <sup>l</sup> -Gd1-O5 <sup>k</sup>                                                                            | 124.30(10) | Na2 <sup>o</sup> -O9-Gd1 <sup>s</sup>  | 98.13(12)  | O1 <sup>n</sup> -Na3-Gd1 <sup>t</sup>  | 139.79(11) |
| O9 <sup>l</sup> -Gd1-O5 <sup>k</sup>                                                                             | 72.26(10)  | C2-O9-Na1 <sup>j</sup>                 | 114.9(3)   | O7 <sup>t</sup> -Na3-Gd1 <sup>t</sup>  | 38.32(7)   |
| O1-Gd1-O8                                                                                                        | 131.35(11) | Na2 <sup>o</sup> -O9-Na1 <sup>j</sup>  | 88.03(12)  | O3 <sup>t</sup> -Na3-Gd1 <sup>t</sup>  | 84.27(8)   |
| O4-Gd1-O8                                                                                                        | 69.00(10)  | Gd1 <sup>s</sup> -O9-Na1 <sup>j</sup>  | 114.01(12) | S1 <sup>n</sup> -Na3-Gd1 <sup>t</sup>  | 145.30(6)  |
| O3 <sup>j</sup> -Gd1-O8                                                                                          | 70.47(10)  | C1-O10-Gd1 <sup>s</sup>                | 120.8(3)   | Gd1 <sup>n</sup> -Na3-Gd1 <sup>t</sup> | 124.46(5)  |
| O6 <sup>k</sup> -Gd1-O8                                                                                          | 69.62(10)  | C1-O10-Na3 <sup>q</sup>                | 132.5(3)   | Na1 <sup>n</sup> -Na3-Gd1 <sup>t</sup> | 114.72(6)  |
| O7-Gd1-O8                                                                                                        | 65.11(10)  | Gd1 <sup>s</sup> -O10-Na3 <sup>q</sup> | 92.75(11)  | Na2 <sup>n</sup> -Na3-Gd1 <sup>t</sup> | 96.99(5)   |
| O10 <sup>l</sup> -Gd1-O8                                                                                         | 126.00(10) | O2-Na1-O1W                             | 86.69(19)  | O2-Na2-O4 <sup>u</sup>                 | 130.77(14) |
| O9 <sup>l</sup> -Gd1-O8                                                                                          | 135.76(10) | O2-Na1-O4 <sup>v</sup>                 | 161.11(14) | O2-Na2-O9 <sup>v</sup>                 | 115.86(14) |

| Journal Name                           | ARTICLE    |                                        |            |                                        |            |
|----------------------------------------|------------|----------------------------------------|------------|----------------------------------------|------------|
| O5 <sup>k</sup> -Gd1-O8                | 109.33(10) | O1W-Na1-O4 <sup>v</sup>                | 112.07(19) | O4 <sup>u</sup> -Na2-O9 <sup>v</sup>   | 81.41(12)  |
| O1-Gd1-S2 <sup>k</sup>                 | 105.48(9)  | O2-Na1-O8 <sup>v</sup>                 | 100.09(12) | O2-Na2-O6 <sup>u</sup>                 | 162.44(16) |
| O4-Gd1-S2 <sup>k</sup>                 | 98.05(8)   | O1W-Na1-O8 <sup>v</sup>                | 136.41(15) | O4 <sup>u</sup> -Na2-O6 <sup>u</sup>   | 59.58(11)  |
| O3 <sup>j</sup> -Gd1-S2 <sup>k</sup>   | 156.28(8)  | O4 <sup>v</sup> -Na1-O8 <sup>v</sup>   | 68.24(11)  | O9 <sup>v</sup> -Na2-O6 <sup>u</sup>   | 77.63(12)  |
| O6 <sup>k</sup> -Gd1-S2 <sup>k</sup>   | 28.36(8)   | O2-Na1-O9 <sup>u</sup>                 | 87.56(12)  | O2-Na2-O3                              | 59.86(11)  |
| O7-Gd1-S2 <sup>k</sup>                 | 76.98(8)   | O1W-Na1-O9 <sup>u</sup>                | 134.10(15) | O4 <sup>u</sup> -Na2-O3                | 80.37(11)  |
| O10 <sup>l</sup> -Gd1-S2 <sup>k</sup>  | 136.79(7)  | O4 <sup>v</sup> -Na1-O9 <sup>u</sup>   | 77.81(11)  | O9 <sup>v</sup> -Na2-O3                | 146.62(15) |
| O9 <sup>l</sup> -Gd1-S2 <sup>k</sup>   | 72.63(7)   | O8 <sup>v</sup> -Na1-O9 <sup>u</sup>   | 89.40(12)  | O6 <sup>u</sup> -Na2-O3                | 115.61(13) |
| O5 <sup>k</sup> -Gd1-S2 <sup>k</sup>   | 29.03(8)   | O2-Na1-O6 <sup>p</sup>                 | 123.15(13) | O2-Na2-O8 <sup>u</sup>                 | 73.24(12)  |
| O8-Gd1-S2 <sup>k</sup>                 | 88.75(7)   | O1W-Na1-O6 <sup>p</sup>                | 73.64(14)  | O4 <sup>u</sup> -Na2-O8 <sup>u</sup>   | 62.54(11)  |
| O1-Gd1-Na2 <sup>j</sup>                | 125.09(9)  | O4 <sup>v</sup> -Na1-O6 <sup>p</sup>   | 67.19(11)  | O9 <sup>v</sup> -Na2-O8 <sup>u</sup>   | 84.46(12)  |
| O4-Gd1-Na2 <sup>j</sup>                | 41.30(8)   | O8 <sup>v</sup> -Na1-O6 <sup>p</sup>   | 66.65(11)  | O6 <sup>u</sup> -Na2-O8 <sup>u</sup>   | 121.15(12) |
| O3 <sup>j</sup> -Gd1-Na2 <sup>j</sup>  | 45.58(9)   | O9 <sup>u</sup> -Na1-O6 <sup>p</sup>   | 142.80(12) | O3-Na2-O8 <sup>u</sup>                 | 62.32(10)  |
| O6 <sup>k</sup> -Gd1-Na2 <sup>j</sup>  | 100.60(8)  | O2-Na1-O5 <sup>v</sup>                 | 130.35(13) | O2-Na2-O1W <sup>s</sup>                | 96.14(14)  |
| O7-Gd1-Na2 <sup>j</sup>                | 107.80(8)  | O1W-Na1-O5 <sup>v</sup>                | 83.40(18)  | O4 <sup>u</sup> -Na2-O1W <sup>s</sup>  | 95.53(14)  |
| O10 <sup>l</sup> -Gd1-Na2 <sup>j</sup> | 73.54(8)   | O4 <sup>v</sup> -Na1-O5 <sup>v</sup>   | 53.76(10)  | O9 <sup>v</sup> -Na2-O1W <sup>s</sup>  | 140.30(14) |
| O9 <sup>l</sup> -Gd1-Na2 <sup>j</sup>  | 109.55(8)  | O8 <sup>v</sup> -Na1-O5 <sup>v</sup>   | 120.05(12) | O6 <sup>u</sup> -Na2-O1W <sup>s</sup>  | 67.20(13)  |
| O5 <sup>k</sup> -Gd1-Na2 <sup>j</sup>  | 157.45(9)  | O9 <sup>u</sup> -Na1-O5 <sup>v</sup>   | 66.53(10)  | O3-Na2-O1W <sup>s</sup>                | 69.41(12)  |
| O8-Gd1-Na2 <sup>j</sup>                | 52.94(8)   | O6 <sup>p</sup> -Na1-O5 <sup>v</sup>   | 100.24(12) | O8 <sup>u</sup> -Na2-O1W <sup>s</sup>  | 129.21(12) |
| S2 <sup>k</sup> -Gd1-Na2 <sup>j</sup>  | 128.73(4)  | O2-Na1-S2 <sup>v</sup>                 | 153.12(11) | O2-Na2-S1                              | 29.36(8)   |
| O1-Gd1-Na3 <sup>m</sup>                | 43.32(9)   | O1W-Na1-S2 <sup>v</sup>                | 99.82(18)  | O4 <sup>u</sup> -Na2-S1                | 108.63(10) |
| O4-Gd1-Na3 <sup>m</sup>                | 109.63(8)  | O4 <sup>v</sup> -Na1-S2 <sup>v</sup>   | 26.04(7)   | O9 <sup>v</sup> -Na2-S1                | 139.39(12) |
| O3 <sup>j</sup> -Gd1-Na3 <sup>m</sup>  | 45.31(8)   | O8 <sup>v</sup> -Na1-S2 <sup>v</sup>   | 93.06(9)   | O6 <sup>u</sup> -Na2-S1                | 141.93(12) |
| O6 <sup>k</sup> -Gd1-Na3 <sup>m</sup>  | 175.67(8)  | O9 <sup>u</sup> -Na1-S2 <sup>v</sup>   | 69.11(8)   | O3-Na2-S1                              | 30.84(7)   |
| O7-Gd1-Na3 <sup>m</sup>                | 93.50(8)   | O6 <sup>p</sup> -Na1-S2 <sup>v</sup>   | 83.58(9)   | O8 <sup>u</sup> -Na2-S1                | 67.70(8)   |
| O10 <sup>l</sup> -Gd1-Na3 <sup>m</sup> | 43.71(8)   | O5 <sup>v</sup> -Na1-S2 <sup>v</sup>   | 27.76(7)   | O1W <sup>s</sup> -Na2-S1               | 79.25(10)  |
| O9 <sup>l</sup> -Gd1-Na3 <sup>m</sup>  | 100.13(8)  | O2-Na1-Na2 <sup>r</sup>                | 117.75(11) | O2-Na2-S2 <sup>u</sup>                 | 159.22(12) |
| O5 <sup>k</sup> -Gd1-Na3 <sup>m</sup>  | 119.48(8)  | O1W-Na1-Na2 <sup>r</sup>               | 153.00(19) | O4 <sup>u</sup> -Na2-S2 <sup>u</sup>   | 29.98(8)   |
| O8-Gd1-Na3 <sup>m</sup>                | 114.70(7)  | O4 <sup>v</sup> -Na1-Na2 <sup>r</sup>  | 43.47(9)   | O9 <sup>v</sup> -Na2-S2 <sup>u</sup>   | 75.44(9)   |
| S2 <sup>k</sup> -Gd1-Na3 <sup>m</sup>  | 148.48(4)  | O8 <sup>v</sup> -Na1-Na2 <sup>r</sup>  | 54.83(8)   | O6 <sup>u</sup> -Na2-S2 <sup>u</sup>   | 29.79(8)   |
| Na2 <sup>j</sup> -Gd1-Na3 <sup>m</sup> | 82.77(5)   | O9 <sup>u</sup> -Na1-Na2 <sup>r</sup>  | 44.17(8)   | O3-Na2-S2 <sup>u</sup>                 | 100.78(9)  |
| O2-S1-O1                               | 102.71(19) | O6 <sup>p</sup> -Na1-Na2 <sup>r</sup>  | 99.22(9)   | O8 <sup>u</sup> -Na2-S2 <sup>u</sup>   | 91.52(9)   |
| O2-S1-O3                               | 105.47(18) | O5 <sup>v</sup> -Na1-Na2 <sup>r</sup>  | 72.12(8)   | O1W <sup>s</sup> -Na2-S2 <sup>u</sup>  | 82.44(11)  |
| O1-S1-O3                               | 102.14(18) | S2 <sup>v</sup> -Na1-Na2 <sup>r</sup>  | 53.20(5)   | S1-Na2-S2 <sup>u</sup>                 | 131.61(7)  |
| O2-S1-Na2                              | 47.67(13)  | O2-Na1-Na2 <sup>l</sup>                | 140.67(11) | O2-Na2-S2 <sup>m</sup>                 | 86.40(10)  |
| O1-S1-Na2                              | 103.15(15) | O1W-Na1-Na2 <sup>l</sup>               | 55.09(16)  | O4 <sup>u</sup> -Na2-S2 <sup>m</sup>   | 141.26(10) |
| O3-S1-Na2                              | 58.58(13)  | O4 <sup>v</sup> -Na1-Na2 <sup>l</sup>  | 58.13(9)   | O9 <sup>v</sup> -Na2-S2 <sup>m</sup>   | 70.63(9)   |
| O2-S1-Na3 <sup>m</sup>                 | 52.01(13)  | O8 <sup>v</sup> -Na1-Na2 <sup>l</sup>  | 102.20(9)  | O6 <sup>u</sup> -Na2-S2 <sup>m</sup>   | 87.95(10)  |
| O1-S1-Na3 <sup>m</sup>                 | 52.32(13)  | O9 <sup>u</sup> -Na1-Na2 <sup>l</sup>  | 124.44(10) | O3-Na2-S2 <sup>m</sup>                 | 136.47(10) |
| O3-S1-Na3 <sup>m</sup>                 | 123.27(14) | O6 <sup>p</sup> -Na1-Na2 <sup>l</sup>  | 43.44(8)   | O8 <sup>u</sup> -Na2-S2 <sup>m</sup>   | 136.85(10) |
| Na2-S1-Na3 <sup>m</sup>                | 77.63(6)   | O5 <sup>v</sup> -Na1-Na2 <sup>l</sup>  | 60.65(8)   | O1W <sup>s</sup> -Na2-S2 <sup>m</sup>  | 89.74(11)  |
| O6-S2-O(5)                             | 102.63(18) | S2 <sup>v</sup> -Na1-Na2 <sup>l</sup>  | 56.30(5)   | S1-Na2-S2 <sup>m</sup>                 | 110.06(7)  |
| O6-S2-O4                               | 103.77(19) | Na2 <sup>r</sup> -Na1-Na2 <sup>l</sup> | 101.58(5)  | S2 <sup>u</sup> -Na2-S2 <sup>m</sup>   | 114.26(7)  |
| O5-S2-O4                               | 103.14(18) | O2-Na1-Na2                             | 35.38(9)   | O2-Na2-Na1 <sup>r</sup>                | 113.27(12) |
| O6-S2-Na2 <sup>j</sup>                 | 52.82(14)  | O1W-Na1-Na2                            | 114.18(18) | O4 <sup>u</sup> -Na2-Na1 <sup>r</sup>  | 44.12(9)   |
| O5-S2-Na2 <sup>j</sup>                 | 105.69(14) | O4 <sup>v</sup> -Na1-Na2               | 129.61(10) | O9 <sup>v</sup> -Na2-Na1 <sup>r</sup>  | 47.80(9)   |
| O4-S2-Na2 <sup>j</sup>                 | 51.37(13)  | O8 <sup>v</sup> -Na1-Na2               | 64.88(8)   | O6 <sup>u</sup> -Na2-Na1 <sup>r</sup>  | 84.01(10)  |
| O6-S2-Gd1 <sup>t</sup>                 | 49.34(12)  | O9 <sup>u</sup> -Na1-Na2               | 84.18(9)   | O3-Na2-Na1 <sup>r</sup>                | 101.03(10) |
| O5-S2-Gd1 <sup>t</sup>                 | 53.32(12)  | O6 <sup>p</sup> -Na1-Na2               | 108.29(10) | O8 <sup>u</sup> -Na2-Na1 <sup>r</sup>  | 45.54(8)   |
| O4-S2-Gd1 <sup>t</sup>                 | 113.28(12) | O5 <sup>v</sup> -Na1-Na2               | 149.63(10) | O1W <sup>s</sup> -Na2-Na1 <sup>r</sup> | 139.41(12) |
| Na2 <sup>j</sup> -S2-Gd1 <sup>t</sup>  | 74.53(4)   | S2 <sup>v</sup> -Na1-Na2               | 145.84(7)  | S1-Na2-Na1 <sup>r</sup>                | 113.23(8)  |
| O6-S2-Na2 <sup>n</sup>                 | 173.48(15) | Na2 <sup>r</sup> -Na1-Na2              | 92.82(7)   | S2 <sup>u</sup> -Na2-Na1 <sup>r</sup>  | 60.05(5)   |
| O5-S2-Na2 <sup>n</sup>                 | 78.08(13)  | Na2 <sup>l</sup> -Na1-Na2              | 149.70(7)  | S2 <sup>m</sup> -Na2-Na1 <sup>r</sup>  | 118.24(7)  |
| O4-S2-Na2 <sup>n</sup>                 | 69.85(13)  | O2-Na1-Gd1 <sup>v</sup>                | 139.31(11) | O2-Na2-Na1 <sup>s</sup>                | 115.62(12) |
| Na2 <sup>j</sup> -S2-Na2 <sup>n</sup>  | 120.69(5)  | O1W-Na1-Gd1 <sup>v</sup>               | 110.32(14) | O4 <sup>u</sup> -Na2-Na1 <sup>s</sup>  | 104.21(10) |

|                                       |            |                                        |            |                                        |            |
|---------------------------------------|------------|----------------------------------------|------------|----------------------------------------|------------|
| Gd1 <sup>t</sup> -S2-Na2 <sup>n</sup> | 131.18(5)  | O4 <sup>v</sup> -Na1-Gd1 <sup>v</sup>  | 37.46(8)   | O9 <sup>v</sup> -Na2-Na1 <sup>s</sup>  | 101.03(10) |
| O6-S2-Na1 <sup>o</sup>                | 108.71(14) | O8 <sup>v</sup> -Na1-Gd1 <sup>v</sup>  | 42.23(7)   | O6 <sup>u</sup> -Na2-Na1 <sup>s</sup>  | 48.10(9)   |
| O5-S2-Na1 <sup>o</sup>                | 59.27(13)  | O9 <sup>u</sup> -Na1-Gd1 <sup>v</sup>  | 103.35(9)  | O3-Na2-Na1 <sup>s</sup>                | 110.43(11) |
| O4-S2-Na1 <sup>o</sup>                | 43.98(12)  | O6 <sup>p</sup> -Na1-Gd1 <sup>v</sup>  | 39.93(7)   | O8 <sup>u</sup> -Na2-Na1 <sup>s</sup>  | 165.04(10) |
| Na2 <sup>i</sup> -S2-Na1 <sup>o</sup> | 66.75(6)   | O5 <sup>v</sup> -Na1-Gd1 <sup>v</sup>  | 89.20(8)   | O1W <sup>s</sup> -Na2-Na1 <sup>s</sup> | 41.07(9)   |
| Gd1 <sup>t</sup> -S2-Na1 <sup>o</sup> | 83.52(4)   | S2 <sup>v</sup> -Na1-Gd1 <sup>v</sup>  | 62.54(4)   | S1-Na2-Na1 <sup>s</sup>                | 113.51(8)  |
| Na2 <sup>n</sup> -S2-Na1 <sup>o</sup> | 65.93(6)   | Na2 <sup>i</sup> -Na1-Gd1 <sup>v</sup> | 59.35(4)   | S2 <sup>u</sup> -Na2-Na1 <sup>s</sup>  | 76.63(6)   |
| S2-O6-Gd1 <sup>t</sup>                | 102.30(16) | Na2 <sup>l</sup> -Na1-Gd1 <sup>v</sup> | 61.33(4)   | S2 <sup>m</sup> -Na2-Na1 <sup>s</sup>  | 57.77(5)   |
| S2-O6-Na2 <sup>j</sup>                | 97.39(17)  | Na2-Na1-Gd1 <sup>v</sup>               | 105.93(6)  | Na1 <sup>r</sup> -Na2-Na1 <sup>s</sup> | 130.30(6)  |
| Gd1 <sup>t</sup> -O6-Na2 <sup>j</sup> | 100.15(13) | O5-Na3-O2 <sup>n</sup>                 | 89.66(12)  | Na1-O1W-Na2 <sup>j</sup>               | 83.84(18)  |
| S2-O6-Na1 <sup>p</sup>                | 159.58(19) | O5-Na3-O10 <sup>w</sup>                | 163.59(14) | Na1-O1W-H1WA                           | 127(4)     |
| Gd1 <sup>t</sup> -O6-Na1 <sup>p</sup> | 95.84(11)  | O2 <sup>n</sup> -Na3-O10 <sup>w</sup>  | 103.28(12) | Na2 <sup>l</sup> -O1W-H1WA             | 72(5)      |
| Na2 <sup>i</sup> -O6-Na1 <sup>p</sup> | 88.46(12)  | O5-Na3-O1 <sup>n</sup>                 | 112.21(13) | Na1-O1W-H1WB                           | 124(4)     |
| C2-O8-Na1 <sup>o</sup>                | 135.2(3)   | O2 <sup>n</sup> -Na3-O1 <sup>n</sup>   | 56.28(11)  | Na2 <sup>l</sup> -O1W-H1WB             | 95(5)      |
| C2-O8-Gd1                             | 118.4(3)   | O10 <sup>w</sup> -Na3-O1 <sup>n</sup>  | 68.60(11)  | H1WA-O1W-H1WB                          |            |
| Na1 <sup>o</sup> -O8-Gd1              | 95.87(11)  | O5-Na3-O7 <sup>t</sup>                 | 70.60(11)  | Na2 <sup>l</sup> -O1W-H1WB             | 95(5)      |
| C2-O8-Na2 <sup>j</sup>                | 129.6(3)   | O2 <sup>n</sup> -Na3-O7 <sup>t</sup>   | 132.09(13) | H1WA-O1W-H1WB                          |            |
| Na1 <sup>o</sup> -O8-Na2 <sup>j</sup> | 79.63(10)  | O10 <sup>w</sup> -Na3-O7 <sup>t</sup>  | 106.37(12) | Na2 <sup>l</sup> -O1W-H1WB             | 95(5)      |
| Gd1-O8-Na2 <sup>j</sup>               | 82.53(9)   | O1 <sup>n</sup> -Na3-O7 <sup>t</sup>   | 171.63(13) | H1WA-O1W-H1WB                          | 105(3)     |
| S1-O2-Na2                             | 102.97(17) | O5-Na3-O3 <sup>t</sup>                 | 100.48(13) |                                        |            |
| S1-O2-Na1                             | 132.51(19) | O2 <sup>n</sup> -Na3-O3 <sup>t</sup>   | 128.23(13) |                                        |            |
| Na2-O2-Na1                            | 108.35(15) | O10 <sup>w</sup> -Na3-O3 <sup>t</sup>  | 63.60(11)  |                                        |            |
| S1-O2-Na3 <sup>m</sup>                | 99.64(16)  | O1 <sup>n</sup> -Na3-O3 <sup>t</sup>   | 73.15(11)  |                                        |            |
| Na2-O2-Na3 <sup>m</sup>               | 107.01(14) | O7 <sup>t</sup> -Na3-O3 <sup>t</sup>   | 98.70(12)  |                                        |            |
| Na1-O2-Na3 <sup>m</sup>               | 104.11(13) | O5-Na3-S1 <sup>n</sup>                 | 106.30(10) |                                        |            |
| S1-O3-Gd1 <sup>u</sup>                | 143.76(19) | O2 <sup>n</sup> -Na3-S1 <sup>n</sup>   | 28.35(8)   |                                        |            |
| S1-O3-Na2                             | 90.58(15)  | O10 <sup>w</sup> -Na3-S1 <sup>n</sup>  | 82.13(9)   |                                        |            |
| Gd1 <sup>u</sup> -O3-Na2              | 93.12(12)  | O1 <sup>n</sup> -Na3-S1 <sup>n</sup>   | 28.61(8)   |                                        |            |
| S1-O3-Na3 <sup>k</sup>                | 108.08(17) | O7 <sup>t</sup> -Na3-S1 <sup>n</sup>   | 159.53(11) |                                        |            |
| Gd1 <sup>u</sup> -O3-Na3 <sup>k</sup> | 94.07(11)  | O3 <sup>t</sup> -Na3-S1 <sup>n</sup>   | 101.75(9)  |                                        |            |
| Na2-O3-Na3 <sup>k</sup>               | 135.63(15) | O5-Na3-Gd1 <sup>n</sup>                | 126.70(11) |                                        |            |

#Symmetry transformations used to generate equivalent atoms:

- a)  $x+1,y,z$ ; b)  $-x+1,-y+1,-z+1$ ; c)  $x,-y+1/2,z+1/2$ ; d)  $-x+2,y+1/2,-z+3/2$ ; e)  $x-1,y,z$ ; f)  $x+1,-y+1/2,z+1/2$ ;  
g)  $-x+2,y-1/2,-z+3/2$ ; h)  $x,-y+1/2,z-1/2$ ; i)  $x-1,-y+1/2,z-1/2$ ; j)  $-x+1,y-1/2,-z+1/2$ ; k)  $-x,y+1/2,-z+1/2$ ;  
l)  $x,-y+3/2,z+1/2$ ; m)  $x+1,y,z$ ; n)  $x-1,y,z$ ; o)  $x-1,-y+3/2,z-1/2$ ; p)  $-x+1,-y+1,-z+1$ ; q)  $x+1,-y+3/2,z-1/2$ ;  
r)  $-x+2,-y+2,-z+1$ ; s)  $x,-y+3/2,z-1/2$ ; t)  $-x,y-1/2,-z+1/2$ ; u)  $-x+1,y+1/2,-z+1/2$ ; v)  $x+1,-y+3/2,z+1/2$ ;  
w)  $x-1,-y+3/2,z+1/2$

**Table S3.** Hydrogen bonding table for (CN<sub>3</sub>H<sub>6</sub>)[Na<sub>2</sub>Gd<sub>3</sub>(SO<sub>3</sub>)<sub>6</sub>], **1** and **2**.<sup>#</sup>

| D–H⋯A                                                                                                            | Symmetry of A  | D–H       | H⋯A       | D–A      | ∠D–H⋯A |
|------------------------------------------------------------------------------------------------------------------|----------------|-----------|-----------|----------|--------|
| <b>[NaGd(SO<sub>3</sub>)(C<sub>2</sub>O<sub>4</sub>)(H<sub>2</sub>O)]<sub>∞</sub>, 1</b>                         |                |           |           |          |        |
| O1W–H1WA⋯O7                                                                                                      | 1-x,-y,1-z     | 0.82(5)   | 2.07(6)   | 2.863(4) | 163(5) |
| O1W–H1WB⋯O6                                                                                                      | 2-x,-y,1-z     | 0.82(7)   | 2.00(7)   | 2.813(5) | 171(8) |
| O2W–H2WA⋯O1                                                                                                      | 1-x,-y,-z      | 0.82(5)   | 2.12(6)   | 2.886(5) | 156(6) |
| O2W–H2WB⋯O2                                                                                                      | 1+x,y,z        | 0.81(4)   | 2.09(3)   | 2.874(5) | 164(5) |
| <b>[Na<sub>3</sub>Gd(SO<sub>3</sub>)<sub>2</sub>(C<sub>2</sub>O<sub>4</sub>)(H<sub>2</sub>O)]<sub>∞</sub>, 2</b> |                |           |           |          |        |
| O1W–H1WA⋯O10                                                                                                     | 1-x,-y,-z      | 0.817(19) | 2.101(19) | 2.905(5) | 168(5) |
| O1W–H1WB⋯O1                                                                                                      | x,1/2-y,-1/2+z | 0.82(6)   | 2.59(7)   | 3.299(7) | 147(6) |
| O1W–H1WB⋯O7                                                                                                      | x,1/2-y,-1/2+z | 0.82(6)   | 2.41(6)   | 3.023(6) | 133(6) |

<sup>#</sup>Where 'D' is donor and 'A' is acceptor, the bond lengths are in (Å) and angles are in (°).

**Table S4.** Atomic coordinates ( $\times 10^4$ ) and equivalent isotropic displacement parameters ( $\text{\AA}^2 \times 10^3$ ) for **1-2** U(eq) is defined as one third of the trace of the orthogonalized  $U_{ij}$  tensor.

|                                                                                                                         | X           | Y          | Z          | U(eq)   |      |          | x        | Y        | Z       | U(eq) |
|-------------------------------------------------------------------------------------------------------------------------|-------------|------------|------------|---------|------|----------|----------|----------|---------|-------|
| <b>[NaGd(SO<sub>3</sub>)(C<sub>2</sub>O<sub>4</sub>)(H<sub>2</sub>O)<sub>2</sub>]<math>\infty</math>, 1</b>             |             |            |            |         |      |          |          |          |         |       |
| Gd1                                                                                                                     | 7595.5(3)   | 4172.4(2)  | 7221.3(2)  | 6.94(9) | O5   | 9497(4)  | 2628(2)  | 6461(3)  | 11.1(3) |       |
| S1                                                                                                                      | 2628.8(13)  | 5416.6(8)  | 6999.1(11) | 8.4(2)  | O6   | 9561(4)  | 1610(2)  | 4420(3)  | 11.1(3) |       |
| Na1                                                                                                                     | 12571(2)    | 2809.8(14) | 7747.2(19) | 13.7(4) | O7   | 5517(4)  | 1638(2)  | 4207(3)  | 11.1(3) |       |
| O1                                                                                                                      | 4323(4)     | 4679(2)    | 6611(3)    | 12.9(6) | O1W  | 7328(5)  | 5391(2)  | 9266(4)  | 13.6(6) |       |
| O2                                                                                                                      | 1946(4)     | 5887.4(19) | 5479(4)    | 11.2(6) | O2W  | 12274(5) | 1073(2)  | 8876(4)  | 13.7(6) |       |
| O3                                                                                                                      | 923(4)      | 4696(2)    | 7397(4)    | 17.2(7) | C1   | 8681(6)  | 2132(3)  | 5388(5)  | 8.3(5)  |       |
| O4                                                                                                                      | 5457(4)     | 2709(2)    | 6180(3)    | 11.1(3) | C2   | 6346(6)  | 2170(3)  | 5246(5)  | 8.3(5)  |       |
| <b>[Na<sub>3</sub>Gd(SO<sub>3</sub>)<sub>2</sub>(C<sub>2</sub>O<sub>4</sub>)(H<sub>2</sub>O)]<math>\infty</math>, 2</b> |             |            |            |         |      |          |          |          |         |       |
| Gd1                                                                                                                     | 2314.0(2)   | 7853.2(2)  | 2335.2(2)  | 5.73(8) | O5   | -2082(3) | 5601(3)  | 2865(2)  | 14.9(6) |       |
| S1                                                                                                                      | 5801.5(11)  | 9699.7(11) | 3693.6(8)  | 9.3(2)  | O6   | 37(3)    | 4055(3)  | 3448(2)  | 14.6(6) |       |
| S2                                                                                                                      | -416.0(11)  | 5656.7(11) | 3409.6(8)  | 10.1(2) | O7   | 3292(3)  | 8667(3)  | 795(2)   | 12.0(6) |       |
| Na1                                                                                                                     | 8466.4(19)  | 8364.0(19) | 5906.4(13) | 15.6(4) | O8   | 1109(3)  | 6644(3)  | 578(2)   | 9.2(5)  |       |
| Na2                                                                                                                     | 8850(20)    | 9190(20)   | 3195(16)   | 16(3)   | O9   | 1403(3)  | 6174(3)  | -1083(2) | 9.8(6)  |       |
| Na2A                                                                                                                    | 8680(30)    | 8980(30)   | 2980(17)   | 15(3)   | O10  | 3306(3)  | 8437(3)  | -933(2)  | 10.8(6) |       |
| Na3                                                                                                                     | -4117.6(19) | 6260.5(18) | 3666.5(15) | 17.1(4) | O10  | 3306(3)  | 8437(3)  | -933(2)  | 11(1)   |       |
| O1                                                                                                                      | 4717(3)     | 8667(3)    | 2976(2)    | 16.2(6) | O1W  | 6774(14) | 6660(15) | 6299(9)  | 16(2)   |       |
| O2                                                                                                                      | 7102(3)     | 8701(3)    | 4167(2)    | 12.9(6) | O1WA | 6551(15) | 6553(15) | 5865(9)  | 19(2)   |       |
| O3                                                                                                                      | 6379(3)     | 10659(3)   | 2874(2)    | 14.0(6) | C1   | 2872(4)  | 8086(4)  | -106(3)  | 9.3(6)  |       |
| O4                                                                                                                      | 327(3)      | 6306(3)    | 2545(2)    | 11.9(6) | C2   | 1683(4)  | 6858(4)  | -212(3)  | 9.3(6)  |       |

**Table S5.** Anisotropic displacement parameters ( $\text{\AA}^2 \times 10^3$ ) for complex **1-2**. The anisotropic displacement factor exponent takes the form:  $-2 \pi^2 [h^2 a^{*2} U_{11} + \dots + 2 h k a^* b^* U_{12}]$ 

|                                                                                                                         | U11      | U22       | U33      | U23      | U13      | U12      |      |          |          |          |          |          |          |
|-------------------------------------------------------------------------------------------------------------------------|----------|-----------|----------|----------|----------|----------|------|----------|----------|----------|----------|----------|----------|
| <b>[NaGd(SO<sub>3</sub>)(C<sub>2</sub>O<sub>4</sub>)(H<sub>2</sub>O)<sub>2</sub>]<math>\infty</math>, 1</b>             |          |           |          |          |          |          |      |          |          |          |          |          |          |
| Gd1                                                                                                                     | 3.97(12) | 10.61(13) | 6.36(14) | 0.10(6)  | 1.83(8)  | 0.37(5)  | O5   | 8.3(7)   | 14.6(7)  | 10.4(8)  | -2.9(5)  | 1.7(6)   | 0.0(5)   |
| S1                                                                                                                      | 6.0(4)   | 10.3(5)   | 8.9(5)   | 1.1(3)   | 1.2(4)   | -0.5(3)  | O6   | 8.3(7)   | 14.6(7)  | 10.4(8)  | -2.9(5)  | 1.7(6)   | 0.0(5)   |
| Na1                                                                                                                     | 3.5(8)   | 26.7(10)  | 10.9(9)  | -0.9(6)  | 0.6(6)   | 1.1(5)   | O7   | 8.3(7)   | 14.6(7)  | 10.4(8)  | -2.9(5)  | 1.7(6)   | 0.0(5)   |
| O1                                                                                                                      | 5.1(13)  | 20.1(15)  | 13.6(15) | 0.7(11)  | 2.5(11)  | 4.4(10)  | O1W  | 9.4(15)  | 18.1(16) | 13.5(16) | -5.5(12) | 2.3(12)  | 1.4(11)  |
| O2                                                                                                                      | 10.1(14) | 18.1(15)  | 5.5(15)  | 3.8(10)  | 1.8(12)  | 0.4(10)  | O2W  | 9.7(15)  | 22.0(15) | 9.4(16)  | -1.0(12) | -0.1(13) | 0.2(11)  |
| O3                                                                                                                      | 8.1(15)  | 25.2(16)  | 18.2(17) | 9.8(12)  | 0.6(12)  | -3.7(11) | C1   | 9.0(13)  | 8.2(12)  | 8.0(14)  | 2.3(9)   | 3.4(11)  | -0.2(9)  |
| O4                                                                                                                      | 8.3(7)   | 14.6(7)   | 10.4(8)  | -2.9(5)  | 1.7(6)   | 0.0(5)   | C2   | 9.0(13)  | 8.2(12)  | 8.0(14)  | 2.3(9)   | 3.4(11)  | -0.2(9)  |
| <b>[Na<sub>3</sub>Gd(SO<sub>3</sub>)<sub>2</sub>(C<sub>2</sub>O<sub>4</sub>)(H<sub>2</sub>O)]<math>\infty</math>, 2</b> |          |           |          |          |          |          |      |          |          |          |          |          |          |
| Gd1                                                                                                                     | 5.13(11) | 6.89(11)  | 4.88(11) | -0.02(7) | 0.37(7)  | -0.23(6) | O5   | 11.4(15) | 11.9(14) | 21.5(16) | -3.3(12) | 3.6(13)  | 0.3(11)  |
| S1                                                                                                                      | 9.0(5)   | 10.7(5)   | 8.1(5)   | 0.8(4)   | 1.4(4)   | -1.1(4)  | O6   | 11.5(15) | 11.4(14) | 17.2(15) | 1.2(12)  | -5.7(12) | -1.2(11) |
| S2                                                                                                                      | 12.7(5)  | 10.1(5)   | 8.0(4)   | -1.5(4)  | 3.2(4)   | -3.7(4)  | O7   | 12.8(14) | 15.6(15) | 7.9(13)  | -1.0(11) | 2.7(11)  | -4.0(11) |
| Na1                                                                                                                     | 13.5(8)  | 17.2(8)   | 14.4(8)  | 1.1(7)   | -1.4(7)  | -1.8(7)  | O8   | 10.4(14) | 10.5(13) | 6.6(13)  | -0.6(11) | 1.6(11)  | 0.1(11)  |
| Na2                                                                                                                     | 8(5)     | 16(6)     | 27(8)    | 10(5)    | 7(5)     | 4(4)     | O9   | 12.6(14) | 10.9(14) | 5.5(13)  | -0.3(11) | 1.1(11)  | 0.1(11)  |
| Na2A                                                                                                                    | 13(5)    | 18(5)     | 15(6)    | 2(3)     | 2(4)     | -2(3)    | O10  | 11.1(14) | 14.1(14) | 6.2(13)  | 0.9(11)  | -0.6(11) | -1.3(11) |
| Na3                                                                                                                     | 10.9(8)  | 13.6(8)   | 27.9(10) | 1.9(7)   | 7.0(7)   | 2.1(6)   | O1W  | 12(5)    | 12(4)    | 25(6)    | -1(5)    | 7(5)     | 1(3)     |
| O1                                                                                                                      | 9.0(14)  | 16.6(15)  | 19.5(16) | 3.5(12)  | -5.1(12) | -5.7(11) | O1WA | 17(5)    | 10(4)    | 30(7)    | 0(5)     | 8(5)     | -1(3)    |
| O2                                                                                                                      | 11.2(15) | 16.7(15)  | 9.2(14)  | 2.2(12)  | -1.7(11) | 0.8(11)  | C1   | 6.9(13)  | 11.0(14) | 9.0(14)  | 0.2(10)  | -0.6(11) | 2.2(11)  |
| O3                                                                                                                      | 16.4(15) | 13.8(15)  | 10.7(14) | 4.3(11)  | 0.5(12)  | -5.4(12) | C2   | 6.9(13)  | 11.0(14) | 9.0(14)  | 0.2(10)  | -0.6(11) | 2.2(11)  |
| O4                                                                                                                      | 11.0(14) | 15.1(15)  | 9.2(13)  | 0.5(11)  | 1.5(11)  | -5.6(11) |      |          |          |          |          |          |          |
